# Supplementary material for: Diazoalkane complexes of ruthenium with tris(pyrazolyl)borate and bis(pyrazolyl)acetate ligands
Source: Royal Society of Chemistry journal article supplement (doi:10.1039/c5dt02113h), 2015-01-01
Supplement: c5dt02113h1.pdf [file c5dt02113h1.pdf]

SUPPLEMENTARY INFORMATION

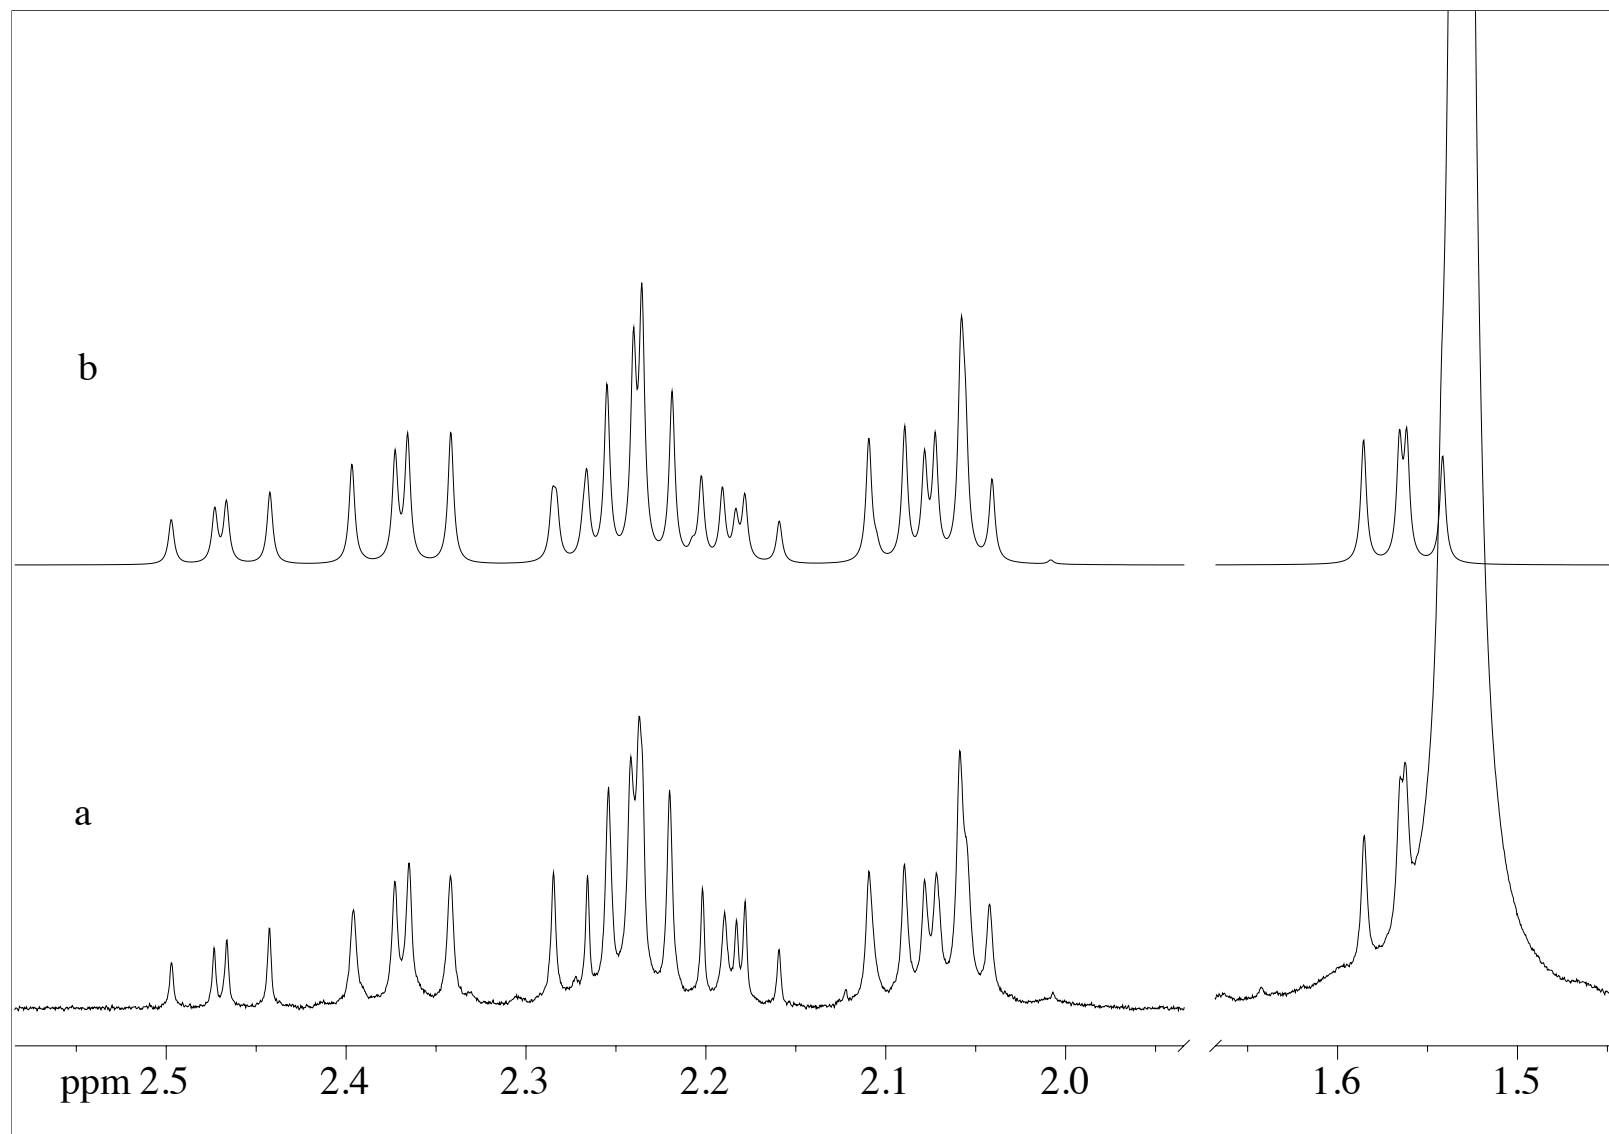

Fig. S1. <sup>1</sup>H NMR spectrum of complex **3c** in CD<sub>2</sub>Cl<sub>2</sub> at 25 °C, pyrazole hydrogens region: a, experimental; b, simulated for the isomers described in the text. See Experimental for simulation parameters.
